# Supplementary material for: Barriers and facilitators of diabetes management by continuous glucose monitoring systems among adults with type 2 diabetes: a protocol of qualitative systematic review
Source: HighWire-hosted journal article supplement (doi:10.1136/bmjopen-2020-046050), 2021-10-01

Additional file 3. PRISMA-2009 Flow Diagram

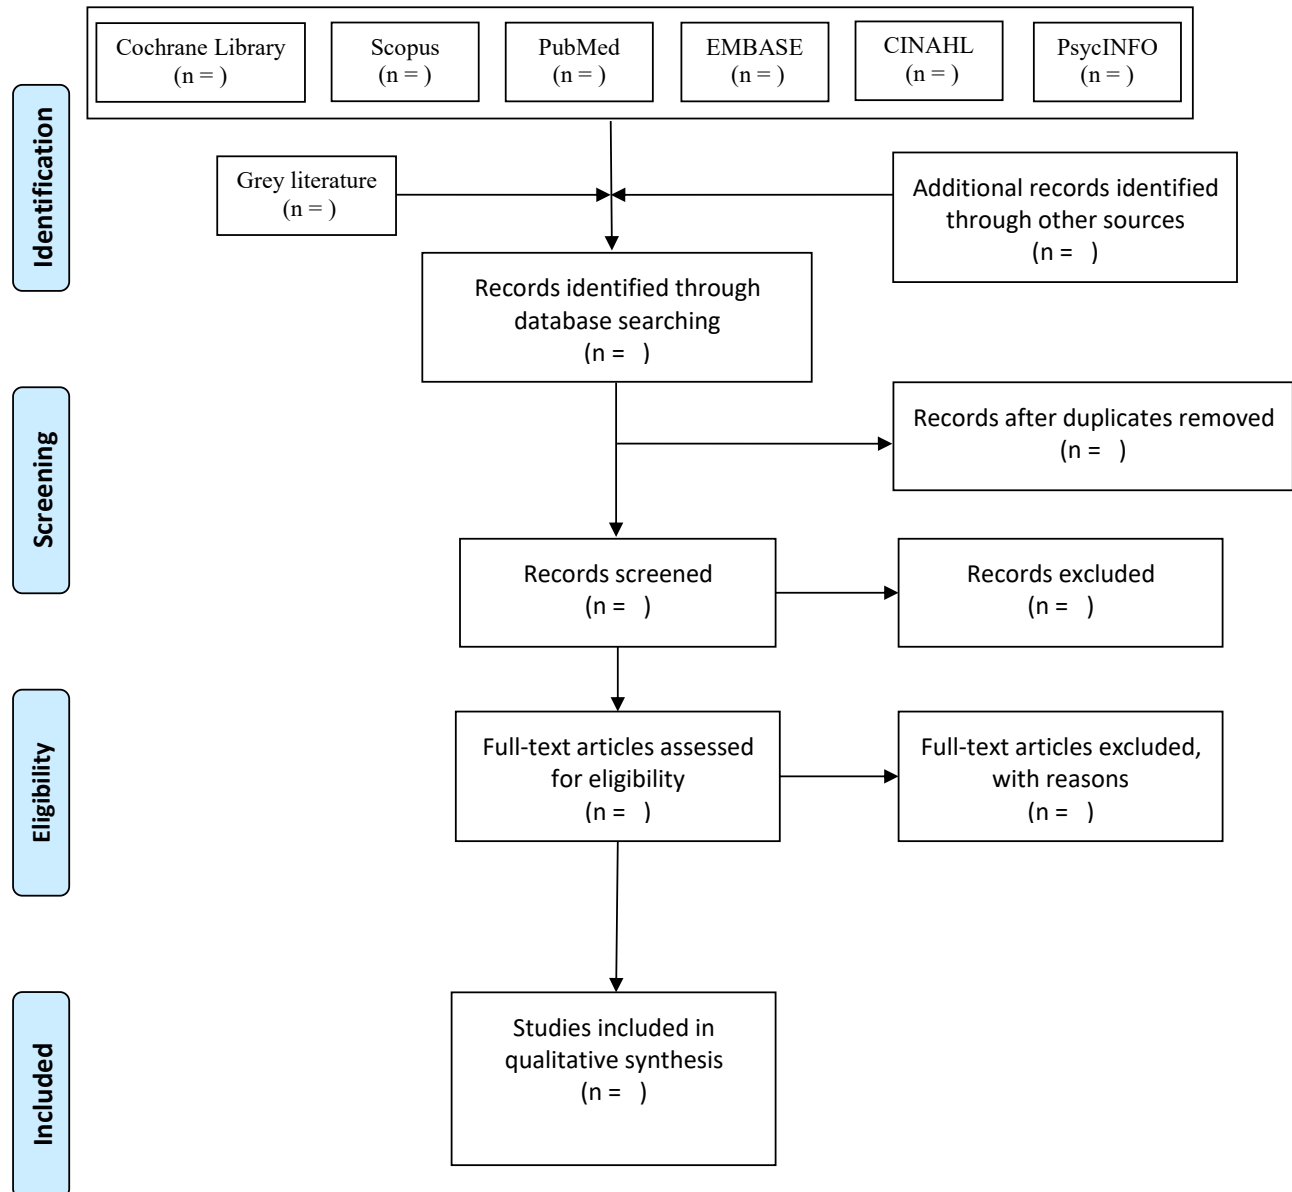

Supplement: bmjopen-2020-046050supp003_data_supplement.pdf [file bmjopen-2020-046050supp003_data_supplement.pdf]
