# Supplementary material for: Barriers and facilitators of diabetes management by continuous glucose monitoring systems among adults with type 2 diabetes: a protocol of qualitative systematic review
Source: HighWire-hosted journal article supplement (doi:10.1136/bmjopen-2020-046050), 2021-10-01
Supplement: bmjopen-2020-046050supp004_data_supplement.pdf [file bmjopen-2020-046050supp004_data_supplement.pdf]

**Additional file 4. Thematic framework analysis format*****Barriers and Facilitators of Diabetes Management by Continuous Glucose Monitoring Systems among Adults with Type 2 Diabetes: A Qualitative Systematic Review***

---

| <b>Main theme</b> | <b>Emerging sub-themes</b> | <b>Barriers of using CGM</b> | <b>Facilitators of using CGM</b> | <b>Studies</b> |
|-------------------|----------------------------|------------------------------|----------------------------------|----------------|
|-------------------|----------------------------|------------------------------|----------------------------------|----------------|

---

---

Note: The thematic analysis will be included but not limited the following categories (possible themes): diabetes management (glucose control, weight management, metabolic syndrome control); living with CGM (quality of life, experience of wearing CGM devices); psychological aspects (anxiety and depression, emotional burden); barriers of CGM use (technical issues, financial issues); and thoughts on CGM report (interpretation, understanding).
